# Supplementary material for: An integrative omics approach to unravel toxicity mechanisms of environmental chemicals: effects of a formulated herbicide
Source: PubMed Central journal article supplement (PMC6063884; doi:10.1038/s41598-018-29662-6), 2018-07-27
Supplement: 41598_2018_29662_MOESM1_ESM.pdf [file 41598_2018_29662_MOESM1_ESM.pdf]

## **Manuscript Title:**

An integrative omics approach to unravel toxicity mechanisms of environmental chemicals:  
effects of a formulated herbicide.

## **Authors:**

Tiago Simões<sup>1,2,3\*</sup>; Sara C. Novais<sup>1,3</sup>; Tiago Natal-da-Luz<sup>2</sup>; Bart Devreese<sup>4</sup>; Tjalf de Boer<sup>3</sup>;  
Dick Roelofs<sup>3</sup>; José P. Sousa<sup>2</sup>; Nico Van Straalen<sup>3</sup>; Marco F.L. Lemos<sup>1</sup>

<sup>1</sup> MARE – Marine and Environmental Sciences Centre, ESTM, Polytechnic Institute of Leiria, Peniche, Portugal;

<sup>2</sup> Centre for Functional Ecology, Department of Life Sciences, University of Coimbra, Portugal;

<sup>3</sup> Institute of Ecological Sciences, Vrije University, Amsterdam, Netherlands;

<sup>4</sup> Unit for Structural Biology, Laboratory for Protein Biochemistry and Biomolecular Engineering (L-ProBE), Ghent University, Belgium;

**Supplementary Table S1:** Physicochemical and mineralogical characterization of the agricultural soil from the lower Mondego valley in Coimbra, Portugal.

| Parameter                                          | LOQ  | Value | Unit                                |
|----------------------------------------------------|------|-------|-------------------------------------|
| <i>Determination from the original sample</i>      |      |       |                                     |
| Dry substance (105°C)                              | 0.1  | 94.2  | % w/w                               |
| Dry substance (105°C)                              | 0.1  | 94.2  | % w/w OS                            |
| pH Value                                           |      | 7.1   |                                     |
| Loss of ignition of the dry substance              | 0.1  | 5.0   | % w/w DS                            |
| Total Nitrogen                                     | 0.05 | 0.20  | % w/w DS                            |
| Bulk Density                                       | 10   | 1300  | g/l DS                              |
| Bulk Density                                       | 10   | 1400  | g/l OS                              |
| Sieve analysis > 0.063 mm                          |      | 68.8  | % DS                                |
| Total sand (0.063 mm -2 mm)                        | 1    | 62    | % w/w ds                            |
| Total silt (0.002 mm - 0.063 mm)                   | 1    | 28    | % w/w ds                            |
| Clay (< 0.002 mm)                                  | 1    | 10    | % w/w ds                            |
| <i>Max. water capacity</i>                         |      |       |                                     |
| pF 1,8                                             |      | 17.7  | w %, w (p <sub>1.8</sub> )          |
| pF 1,8                                             |      | 25.9  | Vol %, $\Theta$ (p <sub>1.8</sub> ) |
| wk max                                             |      | 30.0  | w % w(p <sub>m</sub> )              |
| wk max                                             |      | 44.0  | Vol %, $\Theta$ (p <sub>m</sub> )   |
| <i>Determination from the aqua regia digestion</i> |      |       |                                     |
| Lead                                               | 2    | 23    | mg/Kg DS                            |
| Cadmium                                            | 0.2  | < 0.2 | mg/Kg DS                            |
| Calcium                                            | 20   | 5400  | mg/Kg DS                            |
| Total chromium                                     | 1    | 13    | mg/Kg DS                            |
| Iron                                               | 5    | 16000 | mg/Kg DS                            |
| Potassium                                          | 5    | 1900  | mg/Kg DS                            |
| Cobalt                                             | 1    | 8     | mg/Kg DS                            |
| Copper                                             | 1    | 15    | mg/Kg DS                            |
| Magnesium                                          | 30   | 3600  | mg/Kg DS                            |
| Manganese                                          | 1    | 270   | mg/Kg DS                            |
| Sodium                                             | 10   | 110   | mg/Kg DS                            |
| Nickel                                             | 1    | 12    | mg/Kg DS                            |
| Phosphorus                                         | 10   | 461   | mg/Kg DS                            |
| Zinc                                               | 1    | 63    | mg/Kg DS                            |

**Supplementary Table S2.** Comparison between nominal and analytical concentrations obtained for the active ingredient (glyphosate) and estimated concentration of the adjuvant POEA for Montana® formulation in the soil samples used for the reproduction test of *Folsomia candida*. Limit of quantification (LOQ) was 0.05 mg/kg and recovery rates were within the range of 90-100%.

| <b>Sample</b> | <b>Glyphosate Nominal Concentration (mg/kg d.w.)</b> | <b>Glyphosate Analytical Concentration (mg/kg d.w.)</b> | <b>Estimated POEA Concentration (mg/kg d.w.)</b> |
|---------------|------------------------------------------------------|---------------------------------------------------------|--------------------------------------------------|
| Blank         | 0.00                                                 | <0.05                                                   | 0.00                                             |
| C1            | 0.135                                                | 0.15                                                    | 0.028-0.05                                       |
| C2            | 0.27                                                 | 0.19                                                    | 0.035-0.06                                       |
| C3            | 0.54                                                 | 0.29                                                    | 0.05-0.09                                        |
| C4            | 1.08                                                 | 0.46                                                    | 0.08-0.15                                        |
| C5            | 2.16                                                 | 2.40                                                    | 0.44-0.76                                        |
| C6            | 4.32                                                 | 4.0                                                     | 0.74-1.26                                        |
| EC50          | 4.63                                                 | 4.71                                                    | 0.87-1.49                                        |

**Supplementary Table S3.** Mapping success and library size of the *F. candida* transcriptomic data for all samples used.

| <b>Sample</b> | <b>Library size</b> | <b>Norm.factors</b> | <b>Mapping_success</b> |
|---------------|---------------------|---------------------|------------------------|
| M-4d-Ct1      | 1238042             | 0,806832478         | 84,00                  |
| M-4d-Ct2      | 1171209             | 0,943243745         | 85,41                  |
| M-4d-Ct3      | 1220710             | 0,800502384         | 79,48                  |
| M-4d-Ct4      | 1029405             | 0,929617621         | 84,06                  |
| M-4d-EC1      | 1146310             | 0,763455948         | 83,67                  |
| M-4d-EC2      | 1206891             | 0,691542231         | 85,56                  |
| M-4d-EC3      | 1024094             | 0,816960811         | 83,67                  |
| M-4d-EC4      | 1110364             | 0,735848091         | 76,53                  |
| M-7d-Ct1      | 720197              | 0,895576666         | 85,89                  |
| M-7d-Ct2      | 848792              | 0,904072057         | 87,50                  |
| M-7d-Ct3      | 895177              | 0,883990412         | 88,08                  |
| M-7d-Ct4      | 1033743             | 1,015288301         | 84,40                  |
| M-7d-EC1      | 776787              | 0,882561163         | 87,42                  |
| M-7d-EC2      | 832860              | 1,023217768         | 85,22                  |
| M-7d-EC3      | 811615              | 1,030604606         | 80,56                  |
| M-7d-EC4      | 808539              | 0,855293585         | 82,64                  |
| M-10d-Ct1     | 1044374             | 0,786389535         | 84,41                  |
| M-10d-Ct2     | 1018250             | 1,11208786          | 84,03                  |
| M-10d-Ct3     | 987113              | 1,085230613         | 84,84                  |
| M-10d-Ct4     | 1058690             | 1,124834941         | 83,83                  |
| M-10d-EC1     | 1092173             | 1,208645414         | 73,48                  |
| M-10d-EC2     | 1123560             | 1,126326195         | 78,56                  |
| M-10d-EC3     | 956023              | 1,083366478         | 83,80                  |
| M-10d-EC4     | 969529              | 1,15027951          | 81,27                  |
| Average       | 1005185,29          | 0,94399             | 83,26                  |

**Supplementary Table S4:** Significant differentially expressed transcripts ( $p < 0.05$ ) in *Folsomia candida* after exposure to the herbicide formulation for 4, 7 and 10 days.

| Acc Number                                                            | Blast Homology                               | log2 Fold Change | p-value  | p-value after FDR |
|-----------------------------------------------------------------------|----------------------------------------------|------------------|----------|-------------------|
| <b>Transcripts differentially expressed after 4 days of exposure</b>  |                                              |                  |          |                   |
| <i>down-regulated</i>                                                 |                                              |                  |          |                   |
| GAMN01014780                                                          | Calcium-activated chloride channel regulator | -5,2332          | 4,71E-08 | 0,0018            |
| GAMN01004704                                                          | chaperone protein                            | -3,4533          | 1,09E-07 | 0,0021            |
| GAMN01007081                                                          | chloride channel calcium activated 2-like    | -8,3627          | 1,84E-07 | 0,0023            |
| GAMN01010449                                                          | fatty acid synthase                          | -2,4152          | 1,51E-06 | 0,0144            |
| GAMN01014598                                                          | leucine aminopeptidase                       | -3,0514          | 5,31E-06 | 0,0404            |
| GAMN01007411                                                          | Protein of unknown function                  | -4,4908          | 6,69E-06 | 0,0424            |
| GAMN01000321                                                          | Protein of unknown function                  | -2,7572          | 9,84E-06 | 0,0474            |
| GAMN01012505                                                          | Calcium-activated chloride channel regulator | -7,4635          | 9,98E-06 | 0,0474            |
| <b>Transcripts differentially expressed after 7 days of exposure</b>  |                                              |                  |          |                   |
| <i>up-regulated</i>                                                   |                                              |                  |          |                   |
| GAMN01003982                                                          | moxd1 protein                                | 2,4023           | 7,41E-08 | 0,0028            |
| GAMN01007179                                                          | Protein G12                                  | 3,5869           | 5,19E-07 | 0,0099            |
| GAMN01013249                                                          | -                                            | 5,4933           | 4,50E-06 | 0,0441            |
| GAMN01005039                                                          | glucosylceramidase                           | 2,4141           | 5,30E-06 | 0,0441            |
| GAMN01004068                                                          | dbh-like monooxygenase protein 2 homolog     | 2,6813           | 5,91E-06 | 0,0441            |
| GAMN01011327                                                          | -                                            | 3,4368           | 7,10E-06 | 0,0441            |
| GAMN01000273                                                          | -                                            | 2,1910           | 8,13E-06 | 0,0441            |
| <b>Transcripts differentially expressed after 10 days of exposure</b> |                                              |                  |          |                   |
| <i>up-regulated</i>                                                   |                                              |                  |          |                   |
| GAMN01010546                                                          | -                                            | 3,3029           | 6,63E-09 | 0,0002            |
| GAMN01007291                                                          | pupal cuticle protein 78e                    | 2,0872           | 9,32E-06 | 0,0091            |
| GAMN01012869                                                          | -                                            | 1,3850           | 3,55E-05 | 0,0217            |
| GAMN01036340                                                          | -                                            | 7,0278           | 3,90E-05 | 0,0235            |
| GAMN01000804                                                          | -                                            | 4,6449           | 4,24E-05 | 0,0248            |
| GAMN01016964                                                          | alternative protein dyz1118                  | 5,7863           | 9,01E-05 | 0,0381            |
| <i>down-regulated</i>                                                 |                                              |                  |          |                   |
| GAMN01006077                                                          | Fatty acyl-CoA hydrolase precursor           | -7,5224          | 1,30E-08 | 0,0002            |
| GAMN01011702                                                          | -                                            | -4,4847          | 3,01E-08 | 0,0004            |
| GAMN01011300                                                          | lipase 3 precursor                           | -4,5595          | 5,48E-08 | 0,0005            |
| GAMN01006678                                                          | -                                            | -3,5563          | 8,73E-08 | 0,0007            |
| GAMN01003636                                                          | -                                            | -3,6806          | 1,22E-07 | 0,0008            |
| GAMN01027655                                                          | polyhydroxybutyrate depolymerase             | -4,5350          | 2,43E-07 | 0,0013            |
| GAMN01011789                                                          | Sphingomyelin phosphodiesterase              | -4,0019          | 3,32E-07 | 0,0016            |
| GAMN01004460                                                          | polyhydroxybutyrate depolymerase             | -3,2426          | 4,53E-07 | 0,0018            |
| GAMN01012184                                                          | Fatty acyl-CoA hydrolase precursor           | -4,2080          | 4,65E-07 | 0,0018            |
| GAMN01031326                                                          | -                                            | -6,8000          | 5,36E-07 | 0,0019            |
| GAMN01001830                                                          | -                                            | -3,6197          | 8,84E-07 | 0,0028            |
| GAMN01001593                                                          | Mucin like protein                           | -3,5630          | 1,13E-06 | 0,0033            |

|              |                                                          |         |          |        |
|--------------|----------------------------------------------------------|---------|----------|--------|
| GAMN01007221 | Endoribonuclease                                         | -2,7394 | 1,30E-06 | 0,0033 |
| GAMN01010345 | -                                                        | -3,2546 | 1,36E-06 | 0,0033 |
| GAMN01001426 | u11 u12 small nuclear ribonucleoprotein 35 kda           | -3,8871 | 1,41E-06 | 0,0033 |
| GAMN01011799 | pancreatic triacylglycerol lipase-like                   | -3,2216 | 1,48E-06 | 0,0033 |
| GAMN01012686 | -                                                        | -3,7984 | 1,56E-06 | 0,0033 |
| GAMN01006832 | Epididymal secretory protein like                        | -2,4927 | 1,73E-06 | 0,0035 |
| GAMN01002516 | -                                                        | -4,2263 | 1,98E-06 | 0,0036 |
| GAMN01008214 | -                                                        | -3,8925 | 1,99E-06 | 0,0036 |
| GAMN01011403 | Dopamine beta-hydroxylase                                | -3,3420 | 2,47E-06 | 0,0043 |
| GAMN01001065 | Multiple epidermal growth factor-like domain protein 6   | -3,0009 | 2,66E-06 | 0,0044 |
| GAMN01005688 | -                                                        | -3,7155 | 2,78E-06 | 0,0044 |
| GAMN01019740 | collagen alpha-1 chain                                   | -3,0194 | 4,89E-06 | 0,0074 |
| GAMN01009595 | -                                                        | -4,1383 | 5,32E-06 | 0,0076 |
| GAMN01008681 | -                                                        | -3,3460 | 5,36E-06 | 0,0076 |
| GAMN01002343 | Platelet-activating factor acetylhydrolase IB            | -3,0678 | 5,87E-06 | 0,0076 |
| GAMN01006374 | Zinc carboxypeptidase A 1                                | -3,0407 | 6,12E-06 | 0,0076 |
| GAMN01010918 | vitelline membrane outer layer protein 1 homolog         | -2,6430 | 6,34E-06 | 0,0076 |
| GAMN01013576 | Platelet-activating factor acetylhydrolase IB            | -3,6530 | 6,44E-06 | 0,0076 |
| GAMN01010081 | Desert hedgehog protein                                  | -2,2617 | 6,52E-06 | 0,0076 |
| GAMN01037556 | chitinase partial                                        | -4,0538 | 6,63E-06 | 0,0076 |
| GAMN01010400 | phb depolymerase                                         | -2,8582 | 7,96E-06 | 0,0086 |
| GAMN01026586 | Serine--tRNA ligase                                      | -3,3279 | 8,06E-06 | 0,0086 |
| GAMN01001119 | fibronectin i domain-containing protein                  | -2,9419 | 8,14E-06 | 0,0086 |
| GAMN01027214 | penicillin-binding protein                               | -4,0505 | 8,47E-06 | 0,0086 |
| GAMN01008551 | Astacin                                                  | -2,9278 | 8,55E-06 | 0,0086 |
| GAMN01027440 | -                                                        | -3,0057 | 1,37E-05 | 0,0129 |
| GAMN01009798 | pancreatic triacylglycerol lipase                        | -4,4272 | 1,39E-05 | 0,0129 |
| GAMN01010659 | -                                                        | -2,9221 | 1,47E-05 | 0,0133 |
| GAMN01001993 | vitelline membrane outer layer protein 1 homolog         | -2,6779 | 1,63E-05 | 0,0145 |
| GAMN01037272 | 1-acyl-sn-glycerol-3-phosphate acyltransferase beta-like | -3,0687 | 2,13E-05 | 0,0178 |
| GAMN01010825 | 1-acyl-sn-glycerol-3-phosphate acyltransferase beta-like | -3,0687 | 2,13E-05 | 0,0178 |
| GAMN01016240 | dna rna non-specific endonuclease                        | -4,1099 | 2,15E-05 | 0,0178 |
| GAMN01001848 | -                                                        | -3,1754 | 2,28E-05 | 0,0184 |
| GAMN01005839 | collagen alpha-1 chain                                   | -2,5721 | 2,35E-05 | 0,0186 |
| GAMN01001649 | -                                                        | -2,4222 | 2,43E-05 | 0,0187 |
| GAMN01037019 | Papilin                                                  | -4,9322 | 2,46E-05 | 0,0187 |
| GAMN01010398 | -                                                        | -2,5710 | 2,61E-05 | 0,0192 |
| GAMN01011116 | serine protease family                                   | -2,8896 | 2,72E-05 | 0,0192 |
| GAMN01025128 | aminopeptidase n                                         | -3,2888 | 2,72E-05 | 0,0192 |
| GAMN01009329 | -                                                        | -3,3838 | 2,79E-05 | 0,0192 |
| GAMN01013314 | -                                                        | -2,7242 | 2,80E-05 | 0,0192 |
| GAMN01011814 | -                                                        | -5,0365 | 2,83E-05 | 0,0192 |
| GAMN01000607 | -                                                        | -2,7924 | 3,03E-05 | 0,0202 |
| GAMN01021325 | Aggrecan core protein                                    | -4,9140 | 3,09E-05 | 0,0202 |
| GAMN01002009 | Acetylcholinesterase                                     | -2,6842 | 3,16E-05 | 0,0203 |



|              |                                               |         |          |        |
|--------------|-----------------------------------------------|---------|----------|--------|
| GAMN01010702 | -                                             | -3,8249 | 3,32E-05 | 0,0211 |
| GAMN01010350 | Exodeoxyribonuclease 7 large subunit          | -2,5260 | 3,47E-05 | 0,0216 |
| GAMN01013720 | Fatty acyl-CoA hydrolase                      | -2,7904 | 4,07E-05 | 0,0242 |
| GAMN01010274 | Proteoglycan                                  | -3,7830 | 4,37E-05 | 0,0252 |
| GAMN01001415 | leucyl aminopeptidase                         | -3,1282 | 4,52E-05 | 0,0257 |
| GAMN01022313 | -                                             | -4,3829 | 4,84E-05 | 0,0271 |
| GAMN01001459 | n-acetylmuramoyl-l-alanine amidase            | -3,0410 | 5,07E-05 | 0,0279 |
| GAMN01017940 | protein cbd-1                                 | -6,2154 | 5,21E-05 | 0,0283 |
| GAMN01010945 | Zinc metalloproteinase nas-14                 | -2,8337 | 5,42E-05 | 0,0290 |
| GAMN01000308 | -                                             | -2,3486 | 5,58E-05 | 0,0291 |
| GAMN01002038 | -                                             | -3,1058 | 5,58E-05 | 0,0291 |
| GAMN01028231 | Beta-lactamase                                | -4,2705 | 5,88E-05 | 0,0295 |
| GAMN01016366 | -                                             | -2,5828 | 5,92E-05 | 0,0295 |
| GAMN01002969 | -                                             | -2,4321 | 6,05E-05 | 0,0295 |
| GAMN01008799 | dbh-like monooxygenase protein 1              | -4,5634 | 6,09E-05 | 0,0295 |
| GAMN01001816 | fatty acid-binding protein                    | -2,5754 | 6,24E-05 | 0,0295 |
| GAMN01010525 | -                                             | -1,9619 | 6,25E-05 | 0,0295 |
| GAMN01012003 | Peritrophin-1                                 | -3,2782 | 6,26E-05 | 0,0295 |
| GAMN01026507 | -                                             | -2,7880 | 6,33E-05 | 0,0295 |
| GAMN01012819 | aminopeptidase n-like protein                 | -4,3353 | 6,41E-05 | 0,0295 |
| GAMN01025562 | alkaline tissue-nonspecific isozyme precursor | -5,4563 | 6,51E-05 | 0,0295 |
| GAMN01005102 | dna rna non-specific endonuclease             | -3,1297 | 6,53E-05 | 0,0295 |
| GAMN01002719 | Copine-D                                      | -3,0867 | 7,46E-05 | 0,0334 |
| GAMN01010521 | -                                             | -2,3216 | 7,96E-05 | 0,0350 |
| GAMN01013655 | Cytochrome protein                            | -3,8160 | 8,09E-05 | 0,0350 |
| GAMN01011019 | -                                             | -2,9586 | 8,11E-05 | 0,0350 |
| GAMN01005786 | -                                             | -3,6408 | 8,91E-05 | 0,0380 |
| GAMN01008482 | sphingomyelin phosphodiesterase               | -3,4617 | 9,11E-05 | 0,0381 |
| GAMN01001845 | carboxypeptidase a-like                       | -2,7271 | 9,67E-05 | 0,0400 |
| GAMN01001159 | -                                             | -3,0326 | 9,79E-05 | 0,0400 |
| GAMN01011743 | alkaline phosphatase                          | -2,7778 | 1,00E-04 | 0,0405 |
| GAMN01003952 | -                                             | -2,5680 | 1,06E-04 | 0,0422 |
| GAMN01029760 | membrane protein                              | -4,6349 | 1,08E-04 | 0,0428 |
| GAMN01007170 | chitinase                                     | -2,4909 | 1,17E-04 | 0,0456 |
| GAMN01027507 | Peritrophin-1                                 | -1,9602 | 1,17E-04 | 0,0456 |
| GAMN01012849 | leucine aminopeptidase                        | -3,2269 | 1,19E-04 | 0,0458 |
| GAMN01006525 | -                                             | -2,6990 | 1,24E-04 | 0,0471 |
| GAMN01037991 | -                                             | -2,5002 | 1,27E-04 | 0,0478 |
| GAMN01011217 | Proteoglycan like                             | -2,5647 | 1,34E-04 | 0,0499 |



**Supplementary Table S5:** All significant down- and up-regulated transcripts of the significant ( $p < 0.05$ ) gene ontology (GO) terms (Biological Process and Molecular Function) in *Folsomia candida* after exposure to Montana® herbicide for 4, 7 and 10 days.

| GO ID                                                                        | Domain | Term                                                                | Library Annotated | # Sig. Annotated | p-Value  | Significant Transcripts (Accession number)                                                                                                               |
|------------------------------------------------------------------------------|--------|---------------------------------------------------------------------|-------------------|------------------|----------|----------------------------------------------------------------------------------------------------------------------------------------------------------|
| <b><i>Transcripts differentially expressed after 4 days of exposure</i></b>  |        |                                                                     |                   |                  |          |                                                                                                                                                          |
| <b><i>down-regulated</i></b>                                                 |        |                                                                     |                   |                  |          |                                                                                                                                                          |
| GO:0006633                                                                   | BP     | fatty acid biosynthetic process                                     | 60                | 1                | 0,019    | GAMN01010449                                                                                                                                             |
| GO:0004313                                                                   | MF     | [acyl-carrier-protein] S-acetyltransferase activity                 | 10                | 1                | 0,0026   | GAMN01010449                                                                                                                                             |
| GO:0004316                                                                   | MF     | 3-oxoacyl-[acyl-carrier-protein] reductase (NADPH) activity         | 10                | 1                | 0,0026   | GAMN01010449                                                                                                                                             |
| GO:0004317                                                                   | MF     | 3-hydroxypalmitoyl-[acyl-carrier-protein] dehydratase activity      | 10                | 1                | 0,0026   | GAMN01010449                                                                                                                                             |
| GO:0004319                                                                   | MF     | enoyl-[acyl-carrier-protein] reductase (NADPH, B-specific) activity | 10                | 1                | 0,0026   | GAMN01010449                                                                                                                                             |
| GO:0004320                                                                   | MF     | oleoyl-[acyl-carrier-protein] hydrolase activity                    | 10                | 1                | 0,0026   | GAMN01010449                                                                                                                                             |
| GO:0016295                                                                   | MF     | myristoyl-[acyl-carrier-protein] hydrolase activity                 | 10                | 1                | 0,0026   | GAMN01010449                                                                                                                                             |
| GO:0016296                                                                   | MF     | palmitoyl-[acyl-carrier-protein] hydrolase activity                 | 10                | 1                | 0,0026   | GAMN01010449                                                                                                                                             |
| GO:0004314                                                                   | MF     | [acyl-carrier-protein] S-malonyltransferase activity                | 11                | 1                | 0,0029   | GAMN01010449                                                                                                                                             |
| GO:0004315                                                                   | MF     | 3-oxoacyl-[acyl-carrier-protein] synthase activity                  | 11                | 1                | 0,0029   | GAMN01010449                                                                                                                                             |
| GO:0031177                                                                   | MF     | phosphopantetheine binding                                          | 12                | 1                | 0,0031   | GAMN01010449                                                                                                                                             |
| GO:0004177                                                                   | MF     | aminopeptidase activity                                             | 36                | 1                | 0,0093   | GAMN01014598                                                                                                                                             |
| <b><i>Transcripts differentially expressed after 7 days of exposure</i></b>  |        |                                                                     |                   |                  |          |                                                                                                                                                          |
| <b><i>up-regulated</i></b>                                                   |        |                                                                     |                   |                  |          |                                                                                                                                                          |
| GO:0046519                                                                   | BP     | sphingoid metabolic process                                         | 13                | 1                | 0,0042   | GAMN01005039                                                                                                                                             |
| GO:0055114                                                                   | BP     | oxidation-reduction process                                         | 1100              | 2                | 0,0391   | GAMN01003982; GAMN01004068                                                                                                                               |
| GO:0004348                                                                   | MF     | glucosylceramidase activity                                         | 12                | 1                | 0,0031   | GAMN01005039                                                                                                                                             |
| GO:0016491                                                                   | MF     | oxidoreductase activity                                             | 1271              | 2                | 0,0337   | GAMN01003982; GAMN01004068                                                                                                                               |
| <b><i>Transcripts differentially expressed after 10 days of exposure</i></b> |        |                                                                     |                   |                  |          |                                                                                                                                                          |
| <b><i>up-regulated</i></b>                                                   |        |                                                                     |                   |                  |          |                                                                                                                                                          |
| GO:0005214                                                                   | MF     | structural constituent of chitin-based cuticle                      | 27                | 1                | 0,0023   | GAMN01007291                                                                                                                                             |
| <b><i>down-regulated</i></b>                                                 |        |                                                                     |                   |                  |          |                                                                                                                                                          |
| GO:0006030                                                                   | BP     | chitin metabolic process                                            | 155               | 4                | 6,90E-06 | GAMN01010400; GAMN01009329; AMN01000607; GAMN01012003                                                                                                    |
| GO:0006508                                                                   | BP     | proteolysis                                                         | 827               | 11               | 2,10E-05 | GAMN01008551; GAMN01006374; GAMN01037019; GAMN01025128; GAMN01001845; GAMN01001415; GAMN01012819; GAMN01012849; GAMN01010945; GAMN01011116; GAMN01010081 |
| GO:0030704                                                                   | BP     | vitelline membrane formation                                        | 19                | 2                | 0,0016   | GAMN01019821; GAMN01010918                                                                                                                               |
| GO:0006685                                                                   | BP     | sphingomyelin catabolic process                                     | 2                 | 1                | 0,0063   | GAMN01008482                                                                                                                                             |
| GO:0008654                                                                   | BP     | phospholipid biosynthetic process                                   | 73                | 2                | 0,0217   | GAMN01010825; GAMN01037272                                                                                                                               |
| GO:0009253                                                                   | BP     | peptidoglycan catabolic process                                     | 8                 | 1                | 0,0248   | GAMN01001459                                                                                                                                             |
| GO:0008061                                                                   | MF     | chitin binding                                                      | 135               | 5                | 2,70E-05 | GAMN01010400; GAMN01012003; GAMN01037556; GAMN01000607; GAMN01009329                                                                                     |

|            |    |                                                       |      |   |         |                                                                      |
|------------|----|-------------------------------------------------------|------|---|---------|----------------------------------------------------------------------|
| GO:0003841 | MF | 1-acylglycerol-3-phosphate O-acyltransferase activity | 6    | 2 | 0,0001  | GAMN01010825; GAMN01037272                                           |
| GO:0016787 | MF | hydrolase activity                                    | 2751 | 5 | 0,00018 | GAMN01013576; GAMN01016240; GAMN01002343; GAMN01025128; GAMN01005102 |
| GO:0004568 | MF | chitinase activity                                    | 27   | 2 | 0,00235 | GAMN01037556; GAMN01007170                                           |
| GO:0004181 | MF | metallocarboxypeptidase activity                      | 30   | 2 | 0,0029  | GAMN01018349; GAMN01006374                                           |

**Supplementary Table S6:** Detected protein levels in *Folsomia candida* after exposure to Montana® herbicide for 4, 7 and 10 days.

| Transcript Acc. number                                | Protein homolog                             | Unused score | Fold Change (Log <sub>2</sub> ) | p-value |
|-------------------------------------------------------|---------------------------------------------|--------------|---------------------------------|---------|
| <b><i>Protein levels after 4 days of exposure</i></b> |                                             |              |                                 |         |
| <b><i>up-regulated</i></b>                            |                                             |              |                                 |         |
| GAMN01010129                                          | Protein of unknown function                 | 18           | 0,0315                          | 0,9723  |
| GAMN01001955                                          | ATP synthase subunit beta, mitochondrial    | 8,02         | 0,7878                          | 0,2000  |
| GAMN01010555                                          | 50S ribosomal protein L9                    | 6            | 0,4548                          | 0,5445  |
| GAMN01009525                                          | Actin, muscle                               | 6            | 0,1106                          | 0,6876  |
| GAMN01003161                                          | Tropomyosin                                 | 4            | 0,3383                          | 0,5656  |
| GAMN01001328                                          | Alpha-actinin, sarcomeric                   | 4            | 0,7796                          | 0,2181  |
| GAMN01006975                                          | 60 kDa heat shock protein, mitochondrial    | 4            | 0,8326                          | 0,0848  |
| GAMN01013656                                          | Myosin heavy chain, muscle                  | 2            | 0,0616                          | 0,8953  |
| GAMN01006965                                          | Myosin heavy chain, muscle                  | 2            | 0,3746                          | 0,4715  |
| GAMN01007545                                          | Myosin heavy chain, muscle                  | 2            | 0,4244                          | 0,5227  |
| GAMN01011098                                          | Arginine kinase                             | 2            | 5,6153                          | 0,0798  |
| GAMN01001293                                          | Calectin-2                                  | 2            | 0,8764                          | 0,0922  |
| GAMN01012020                                          | Eukaryotic translation initiation factor 2A | 2            | 0,0012                          | 0,9977  |
| GAMN01003618                                          | Bacillopeptidase F                          | 2            | -                               | -       |
| GAMN01000520                                          | Cofilin/actin-depolymerizing factor         | 2            | 0,1757                          | 0,7545  |
| GAMN01000325                                          | 40S ribosomal protein S19                   | 2            | 0,0852                          | 0,4634  |
| GAMN01001650                                          | Elongation factor 2                         | 2            | 0,2168                          | 0,6132  |
| <b><i>down-regulated</i></b>                          |                                             |              |                                 |         |
| GAMN01008776                                          | Vitellogenin-6                              | 4            | -0,0214                         | 0,9601  |
| GAMN01026524                                          | Larval Cuticle protein                      | 3,05         | -0,3316                         | 0,9121  |
| GAMN01000415                                          | Glutathione S-transferase Mu 1              | 2            | -0,2727                         | 0,8273  |
| GAMN01001896                                          | Protein of unknown function                 | 2            | -0,5145                         | 0,3895  |
| <b><i>Protein levels after 7 days of exposure</i></b> |                                             |              |                                 |         |
| <b><i>up-regulated</i></b>                            |                                             |              |                                 |         |
| GAMN01003161                                          | Tropomyosin                                 | 14,44        | 0,1397                          | 0,7961  |
| GAMN01003691                                          | Actin                                       | 10           | 0,4939                          | 0,3314  |
| GAMN01006818                                          | Vitellogenin-2                              | 9,09         | 1,4673                          | 0,0060  |
| GAMN01009208                                          | Vitellogenin                                | 8,07         | 2,7101                          | 0,0011  |
| GAMN01014973                                          | Endocuticle structural glycoprotein SgAbd-2 | 4            | 0,1811                          | 0,5711  |
| GAMN01010555                                          | 50S ribosomal protein L9                    | 2,12         | 3,7592                          | 0,0049  |
| GAMN01001293                                          | Calectin-2                                  | 2,11         | 0,0377                          | 0,6749  |
| GAMN01000775                                          | Histone H3                                  | 2,09         | 0,0183                          | 0,9099  |
| GAMN01002103                                          | ADP,ATP carrier protein                     | 2            | 1,5475                          | 0,0075  |
| GAMN01032080                                          | Cytochrome c                                | 2            | 3,3266                          | 0,0001  |
| GAMN01003618                                          | Bacillopeptidase F                          | 2            | 0,4098                          | 0,4824  |
| GAMN01014014                                          | cuticle protein-like                        | 2            | 0,7478                          | 0,0863  |
| GAMN01024903                                          | Protein of unknown function                 | 2            | 0,0751                          | 0,4682  |
| GAMN01000325                                          | 40S ribosomal protein S19                   | 2            | 1,8399                          | 0,0081  |
| GAMN01009769                                          | Troponin C, isoform 2                       | 2            | 0,6128                          | 0,2174  |
| GAMN01007158                                          | Peptidyl-prolyl cis-trans isomerase         | 2            | 0,0973                          | 0,9036  |

|                                                 |                                                         |       |         |          |
|-------------------------------------------------|---------------------------------------------------------|-------|---------|----------|
| GAMN01007174                                    | 40S ribosomal protein S4                                | 1,43  | 0,0823  | 0,8997   |
| GAMN01006965                                    | Myosin heavy chain, muscle                              | 0,87  | 0,1746  | 0,6237   |
| GAMN01003635                                    | Heat shock 70 kDa protein cognate 2                     | 0,62  | 1,7905  | 0,0178   |
| GAMN01011035                                    | Malate dehydrogenase, mitochondrial                     | 0,14  | 0,0307  | 0,8930   |
| GAMN01021109                                    | Protein of unknown function                             | 0,08  | 0,5747  | 0,3720   |
| GAMN01007895                                    | Kinesin-related protein                                 | 0,06  | 0,3006  | 0,2310   |
| GAMN01005939                                    | Protein of unknown function                             | 0,05  | 0,0575  | 0,7910   |
| GAMN01002674                                    | Putative ubiquitin -like protein                        | 0,05  | 0,9234  | 0,7210   |
| <i>down-regulated</i>                           |                                                         |       |         |          |
| GAMN01001841                                    | Protein of unknown function                             | 18,12 | -0,1357 | 0,8314   |
| GAMN01001955                                    | ATP synthase subunit beta, mitochondrial                | 11,62 | -0,2090 | 0,6645   |
| GAMN01006818                                    | Vitellogenin-6                                          | 8     | -0,0836 | 0,8438   |
| GAMN01011098                                    | Arginine kinase                                         | 4,07  | -0,1827 | 0,0602   |
| GAMN01026524                                    | Cuticle protein                                         | 4     | -0,1811 | 0,7293   |
| GAMN01027458                                    | Histone H4                                              | 4     | -0,1126 | 0,7301   |
| GAMN01016941                                    | Cuticle protein 7                                       | 2     | -1,0582 | 0,1917   |
| GAMN01022936                                    | Cuticle protein 7                                       | 2     | -0,0189 | 0,9162   |
| GAMN01015530                                    | Protein of unknown function                             | 2     | -0,2966 | 0,2568   |
| GAMN01009199                                    | Cuticle protein 6                                       | 2     | -0,6413 | 0,0290   |
| GAMN01000369                                    | 40S ribosomal protein S18                               | 0,09  | -0,2696 | 0,3420   |
| GAMN01002298                                    | Chito oligosaccharidolytic beta-N-acetylglucosaminidase | 0,07  | -0,0060 | 0,9640   |
| <i>Protein levels after 10 days of exposure</i> |                                                         |       |         |          |
| <i>up-regulated</i>                             |                                                         |       |         |          |
| GAMN01004016                                    | Larval cuticle protein A2B                              | 17,98 | 0,0338  | 0,9501   |
| GAMN01006818                                    | Vitellogenin-2                                          | 14,68 | 3,9662  | 0,0166   |
| GAMN01009208                                    | Vitellogenin                                            | 14,63 | 3,0342  | 0,0220   |
| GAMN01006965                                    | Myosin heavy chain, muscle                              | 12,03 | 0,0965  | 0,7494   |
| GAMN01001955                                    | ATP synthase subunit beta, mitochondrial                | 11,04 | 0,0617  | 0,9255   |
| GAMN01001922                                    | Phenoloxidase 3                                         | 6     | 1,1265  | 0,0904   |
| GAMN01006965                                    | Myosin heavy chain, muscle                              | 4,56  | 1,3457  | 0,0533   |
| GAMN01000430                                    | Fatty acid-binding protein, brain                       | 3,77  | 0,5905  | 0,0033   |
| GAMN01001328                                    | Alpha-actinin, sarcomeric                               | 2,56  | 1,4596  | 0,0023   |
| GAMN01011035                                    | Malate dehydrogenase, mitochondrial                     | 2,01  | 0,2378  | 0,5229   |
| GAMN01007126                                    | Heat shock protein 83                                   | 2     | 0,2769  | 0,4973   |
| GAMN01011769                                    | Troponin T                                              | 2     | 0,0713  | 0,5537   |
| GAMN01007174                                    | 40S ribosomal protein S4                                | 2     | 0,0084  | 0,9789   |
| GAMN01010159                                    | Tubulin beta-3 chain                                    | 2     | 0,5476  | 0,3140   |
| GAMN01012094                                    | Myosin regulatory light chain 2                         | 2     | 0,6461  | 0,5170   |
| GAMN01007002                                    | ATP synthase subunit d, mitochondrial                   | 2     | 0,1316  | 0,3602   |
| GAMN01010569                                    | ATP synthase subunit alpha, mitochondrial               | 2     | -       | -        |
| GAMN01000323                                    | Superoxide dismutase [Cu-Zn]                            | 2     | 6,3326  | 2,02E-06 |
| GAMN01010129                                    | Protein of unknown function                             | 0,55  | -       | -        |
| <i>down-regulated</i>                           |                                                         |       |         |          |
| GAMN01003161                                    | Tropomyosin                                             | 14,35 | -0,9920 | 0,0278   |
| GAMN01003691                                    | Actin                                                   | 12,1  | -0,5049 | 0,4360   |
| GAMN01011098                                    | Arginine kinase                                         | 8     | -1,0167 | 0,1022   |
| GAMN01027458                                    | Histone H4                                              | 6     | -0,4448 | 0,5043   |
| GAMN01008776                                    | Vitellogenin-6                                          | 6     | -0,0088 | 0,9274   |
| GAMN01026524                                    | Cuticle protein                                         | 4     | -0,2471 | 0,5301   |

|              |                                                                     |      |         |        |
|--------------|---------------------------------------------------------------------|------|---------|--------|
| GAMN01012020 | Eukaryotic translation initiation factor 2A                         | 4    | -0,0574 | 0,6511 |
| GAMN01011769 | Troponin T                                                          | 4    | -0,0798 | 0,7494 |
| GAMN01022936 | Cuticle Protein 7                                                   | 4    | -0,2283 | 0,6759 |
| GAMN01001293 | Calexitin-2                                                         | 2,01 | -0,3653 | 0,4186 |
| GAMN01001746 | Calcium-transporting ATPase sarcoplasmic/endoplasmic reticulum type | 2    | -0,1281 | 0,3846 |
| GAMN01026212 | Ultrabiothorax                                                      | 2    | -0,5271 | 0,1070 |
| GAMN01006823 | Glutathione S-transferase                                           | 2    | -0,5912 | 0,0483 |
| GAMN01001827 | Catalase                                                            | 2    | -0,7041 | 0,2472 |
| GAMN01011144 | Endocuticle structural glycoprotein SgAbd-2                         | 2    | -0,9817 | 0,7130 |
| GAMN01007191 | ATPase inhibitor, mitochondrial                                     | 2    | -0,3024 | 0,1156 |
| GAMN01010257 | Tubulin alpha-1 chain                                               | 2    | -0,1579 | 0,3645 |
| GAMN01009769 | Troponin C, isoform 1                                               | 2    | -0,4654 | 0,0932 |
| GAMN01009199 | Cuticle protein 6                                                   | 2    | -0,1851 | 0,7499 |
| GAMN01001896 | Protein of unknown function                                         | 2    | -0,2798 | 0,0180 |
| GAMN01007158 | Peptidyl-prolyl cis-trans isomerase                                 | 2    | -0,0636 | 0,8810 |
| GAMN01004453 | NADH dehydrogenase [ubiquinone] flavoprotein 2, mitochondrial       | 2    | -0,6392 | 0,0142 |
| GAMN01015530 | Protein of unknown function                                         | 1,77 | -0,3061 | 0,0585 |
| GAMN01000369 | 40S ribosomal protein S18                                           | 1,54 | -0,0854 | 0,4521 |
| GAMN01003618 | Bacillopeptidase F                                                  | 0,29 | -0,3413 | 0,3502 |

**Supplementary Table S6:** Pearson correlation coefficients and p-values between gene expression and protein levels of different time points (4, 7 and 10 days of exposure). GE (Gene expression) and PL (Protein Levels).

|                                 | All Genes and Proteins |         |          | Timepoints    |              |          | Stress Related |              |          | Motor Activity |              |          | Development |         |          |
|---------------------------------|------------------------|---------|----------|---------------|--------------|----------|----------------|--------------|----------|----------------|--------------|----------|-------------|---------|----------|
|                                 | $r_p$                  | p-value | <i>N</i> | $r_p$         | p-value      | <i>N</i> | $r_p$          | p-value      | <i>N</i> | $r_p$          | p-value      | <i>N</i> | $r_p$       | p-value | <i>N</i> |
|                                 | -0,13                  | 0,2     | 99       | –             | –            | –        | –              | –            | –        | –              | –            | –        | –           | –       | –        |
| <b>4 Days GE to 4 Days PL</b>   | –                      | –       | –        | 0,148         | 0,534        | 20       | 0,828          | 0,172        | 4        | <b>0,998</b>   | <b>0,011</b> | 4        | –           | 0,366   | 5        |
| <b>4 Days GE to 7 Days PL</b>   | –                      | –       | –        | <b>-0,327</b> | <b>0,05</b>  | 36       | –              | 0,278        | 6        | <b>0,997</b>   | <b>0,047</b> | 3        | –           | 0,546   | 9        |
| <b>4 Days GE to 10 Days PL</b>  | –                      | –       | –        | -0,152        | 0,33         | 43       | <b>0,595</b>   | <b>0,007</b> | 10       | 0,057          | 0,903        | 7        | 0,233       | 0,536   | 10       |
| <b>7 Days GE to 7 Days PL</b>   | –                      | –       | –        | <b>-0,395</b> | <b>0,017</b> | 36       | -0,48          | 0,336        | 6        | 0,6            | 0,591        | 3        | 0,078       | 0,842   | 9        |
| <b>7 Days GE to 10 Days PL</b>  | –                      | –       | –        | <b>-0,443</b> | <b>0,003</b> | 43       | –              | <b>0,661</b> | 10       | -0,351         | 0,44         | 7        | 0,159       | 0,661   | 10       |
| <b>10 Days GE to 10 Days PL</b> | –                      | –       | –        | -0,037        | 0,81         | 43       | <b>0,84</b>    | <b>0,002</b> | 10       | 0,56           | 0,191        | 7        | 0,263       | 0,463   | 10       |

**Supplementary Figure S1:** Heat plot of transcript expression clustering using the SOTA algorithm and individual clusters with the representative differentially expressed genes for each cluster after *Folsomia candida* exposure to Montana® herbicide (4.71 mg glyphosate/kg soil) during 4, 7 and 10 days.

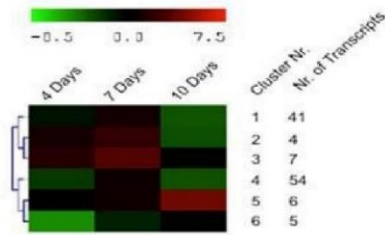

**4 Days Down-Regulated: Cluster 6**

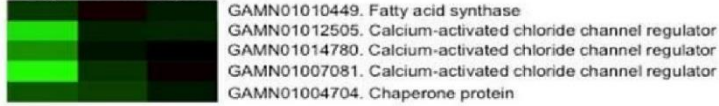

**7 Days Up-regulated: Cluster 3**

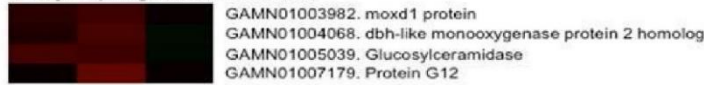

**10 Days Up-regulated: Cluster 5**

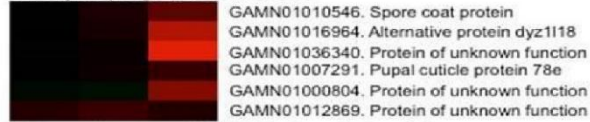

**10 Days Down-regulated: Clusters 1, 2 and 4**

**Lipid degradation/Catabolic process**

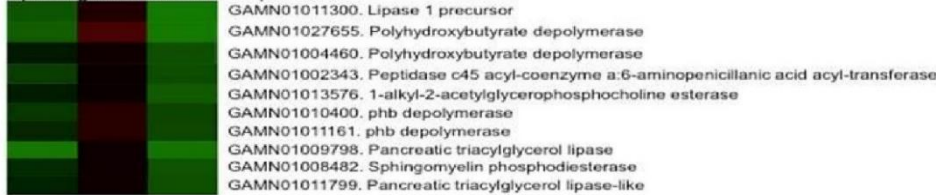

**Lipid biosynthesis**

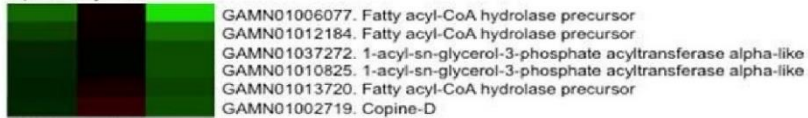

**Chitin metabolism**

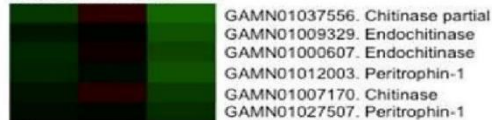

**Stress response**

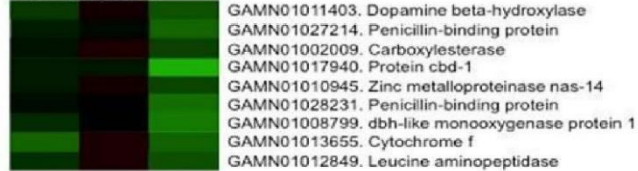

**Reproduction**

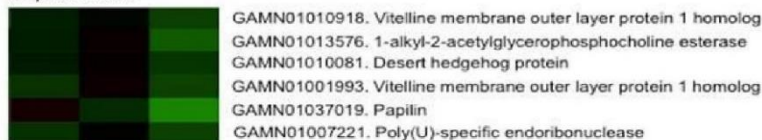

**Development**

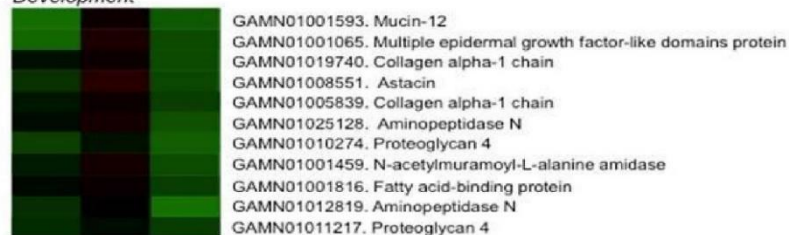

**Supplementary Figure S2:** KEGG pathway analysis performed with *Folsomia candida*'s differentially expressed transcripts after exposure to Montana® herbicide, using KEGG database online (Kanehisa *et al.*, 2017)<sup>52</sup>. Lipid or lipid related metabolic pathways affected are highlighted in red.

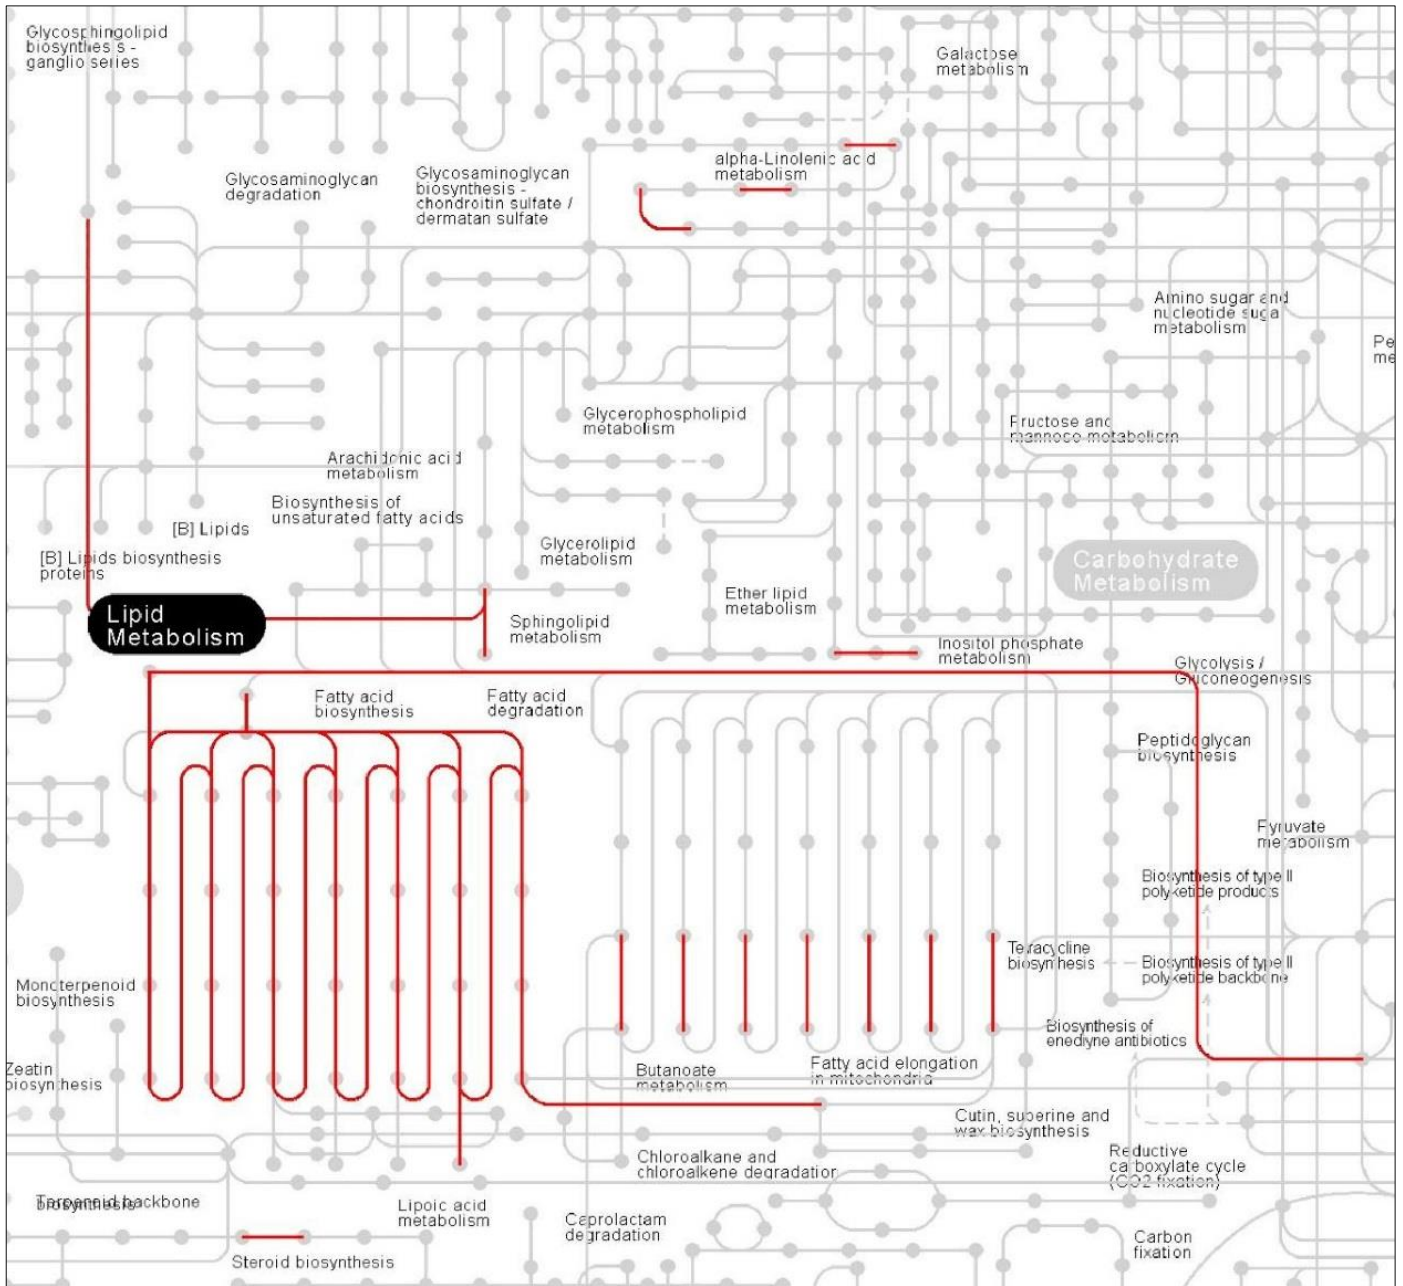



**Supplementary Text.** Supplementary methodological information on fractionation conditions for the peptide separation (2D).

1. First Peptide Fractionation (pH=10)

For the first fractionation, an Ettan LC chromatograph (GE Healthcare, Diegem, Belgium) was used, equipped with a 50  $\mu$ L loop and a Luna 5u C18 column (150 $\times$ 2.0 mm, 5  $\mu$ m, 100 Å; Phenomenex, CA, US). The LC pump was operating at a flow rate of 0.05 mL/min. The mobile phases were 20mM ammonium formate, pH 10, in 2% acetonitrile (ACN) as solvent A, and 20mM ammonium formate in 80% ACN as solvent B. About 100  $\mu$ g of combined labelled samples resuspended in 50  $\mu$ L solvent A were used for injection. The separation gradient consisted of a linear increase from 0% to 50% solvent B over 30 min, followed by 50% to 100% solvent B over 1 min. This percentage was maintained for 5 min prior to returning to the starting conditions. The eluted peptides from the first fractionation were collected every 1 min in different wells of 96-well plates. The absorbance of the effluent was registered at 214, 220, and 280 nm by a UV-900 monitor (GE Healthcare, UK).

2. Second Peptide Fractionation (pH=3)

Samples were collected by a Famos microautosampler (Dionex-LC Packings, Hercules, CA, US) onto a RP trapping column (Pepmap C18, 800  $\mu$ m $\times$ 5 mm) using the Switchos device, equipped with two micro 2-position/10 port valves (Dionex-LC Packings). The loading pump was set to 10  $\mu$ L/min, using 0.05% TFA in 5% ACN as the mobile phase. After 8 min, the valve was switched and the sample was eluted onto the analytical separation column (Pepmap C18, 75  $\mu$ m $\times$ 150 mm), in a back flush mode, using the nano-LC pump operating at 0.3  $\mu$ L/min. At this point, the mobile phases were 0.1% TFA in 5% ACN (solvent A) and 0.1% TFA in 80% ACN (solvent B). Peptides were resolved by gradient elution with a linear increase from 0% to 50% solvent B over 30 min, followed by 50% to 100% solvent B over 10 min. This was maintained for another 5 min before returning to the initial conditions. The column effluent was monitored at 214 nm using a 3 nL UV flow cell (Dionex-LC 720 Packings).
